# Supplementary material for: Characterization of Intrinsically Disordered Prostate Associated Gene (PAGE5) at Single Residue Resolution by NMR Spectroscopy
Source: PLOS journal article supplement (doi:10.1371/journal.pone.0026633), 2011-11-02
Supplement: S3 (10.1371/journal.pone.0026633.s003) [file journal.pone.0026633.s003]

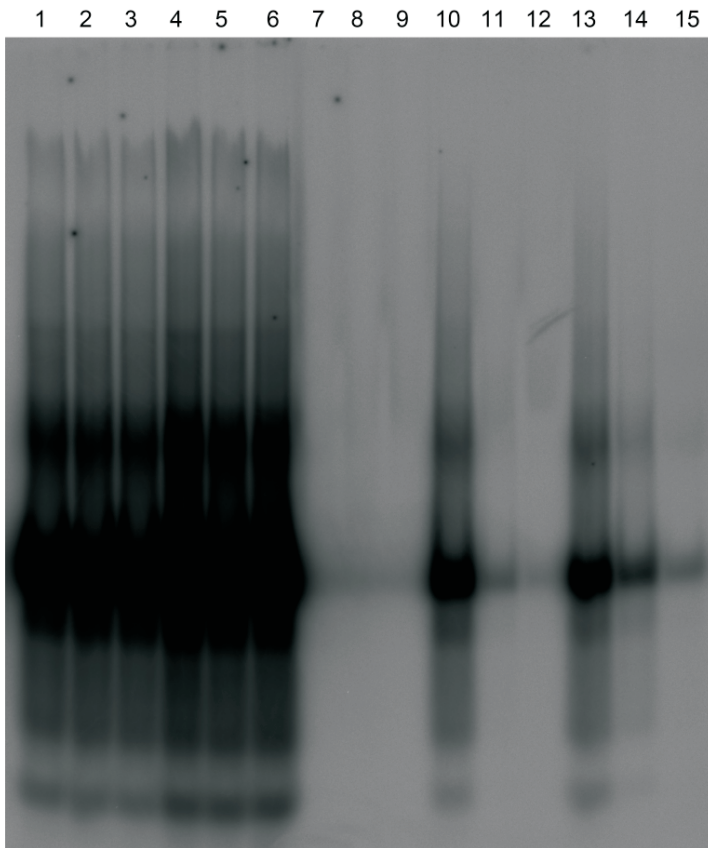

DNA binding test by EMSA. Lanes 1 to 3, 10  $\mu$ M dsDNA pool containing 10-bp stretch of S nucleotides (S probe) incubated with 80, 40 and 20  $\mu$ M CT16. Lanes 4 to 6, 10  $\mu$ M dsDNA pool containing 10-bp stretch of N nucleotides (N probe) incubated with 80, 40 and 20  $\mu$ M CT16. Lanes 10 to 12; 1, 0.1 and 0.01  $\mu$ M S probe. Lanes 13 to 15; 1, 0.1 and 0.01  $\mu$ M N probe. The lanes 7 to 9 are empty. Equal volumes were loaded.
